# Supplementary material for: Deep Learning-Based Cataract Detection and Grading from Slit-Lamp and Retro-Illumination Photographs: Model Development and Validation Study
Source: PubMed Central journal article supplement — Ophthalmol Sci. 2022 Mar 18;2(2):100147. doi: 10.1016/j.xops.2022.100147 (PMC9559082; doi:10.1016/j.xops.2022.100147), 2022-03-18
Supplement: mmc1.pdf [file mmc1.pdf]

**Table S1. A summary of data augmentation techniques and detailed hyper-parameters.**

| <b>Augmentation Techniques</b> | <b>Hyper Parameters</b> |
|--------------------------------|-------------------------|
| Cropping                       | RandomInt (0, 16)       |
| Gaussian Blur                  | Normal (0.0, 3.0)       |
| Flip Horizontal & Vertical     | Probability with 0.5    |
| Rotation                       | Uniform (-45.0, 45.0)   |
| Change Brightness              | Uniform (-30.0, 30.0)   |
| Remove Saturation              | Uniform (0.0, 0.5)      |
