# Supplementary material for: Deep Learning-Based Cataract Detection and Grading from Slit-Lamp and Retro-Illumination Photographs: Model Development and Validation Study
Source: PubMed Central journal article supplement — Ophthalmol Sci. 2022 Mar 18;2(2):100147. doi: 10.1016/j.xops.2022.100147 (PMC9559082; doi:10.1016/j.xops.2022.100147), 2022-03-18
Supplement: mmc2.pdf [file mmc2.pdf]

**Table S2. Summary statistics for the diagnostic performance of the deep learning system on slit-lamp images (NO).**

|                                     | AUC                                      | Sensitivity                | Specificity                | Accuracy                   |
|-------------------------------------|------------------------------------------|----------------------------|----------------------------|----------------------------|
| <b>Normal vs Others</b>             | 0.9986<br>(0.9974 - 0.9999) <sup>j</sup> | 95.33%<br>(89.77%, 100.0%) | 99.51%<br>(98.8%, 100.0%)  | 98.82%<br>(97.69%, 99.94%) |
| <b>Abnormal vs Others</b>           | 0.9988<br>(0.9977 - 0.9999)              | 99.51%<br>(98.8%, 100.0%)  | 95.33%<br>(89.77%, 100.0%) | 98.82%<br>(97.69%, 99.94%) |
| <b>Overall</b>                      | 0.9992<br>(0.9986 - 0.9998)              | 98.82%<br>(97.69%, 99.94%) | 96.02%<br>(91.36%, 100.0%) | 98.82%<br>(97.69%, 99.94%) |
| <b>Overall<br/>(ResNet18)</b>       | 0.9977<br>(0.9962 - 0.9993)              | 98.09%<br>(96.79%, 99.4%)  | 95.94%<br>(91.8%, 100.0%)  | 98.09%<br>(96.79%, 99.4%)  |
| <b>Overall<br/>(WideResNet50-2)</b> | 0.9989<br>(0.9982 - 0.9996)              | 98.4%<br>(97.17%, 99.63%)  | 93.83%<br>(88.53%, 99.13%) | 98.4%<br>(97.17%, 99.63%)  |
| <b>Overall<br/>(ResNext50)</b>      | 0.9989<br>(0.9981 - 0.9996)              | 98.45%<br>(97.26%, 99.64%) | 94.05%<br>(88.46%, 99.63%) | 98.45%<br>(97.26%, 99.64%) |

Asymptotic two-sided 95% CIs, adjusted for clustering by patients, were calculated and presented as proportions (sensitivity, specificity, accuracy) and the AUC.

Abbreviations: NO = nuclear opalescence; CI = confidence interval; AUC = area under the receiver operating characteristic curve
