# Supplementary material for: Deep Learning-Based Cataract Detection and Grading from Slit-Lamp and Retro-Illumination Photographs: Model Development and Validation Study
Source: PubMed Central journal article supplement — Ophthalmol Sci. 2022 Mar 18;2(2):100147. doi: 10.1016/j.xops.2022.100147 (PMC9559082; doi:10.1016/j.xops.2022.100147), 2022-03-18
Supplement: mmc3.pdf [file mmc3.pdf]

**Table S3. Summary statistics for the diagnostic performance of the deep learning system on slit-lamp images (NC).**

|                                     | AUC                         | Sensitivity                | Specificity                | Accuracy                   |
|-------------------------------------|-----------------------------|----------------------------|----------------------------|----------------------------|
| <b>Normal vs Others</b>             | 0.9990<br>(0.9983 - 0.9998) | 90.82%<br>(83.74%, 97.9%)  | 100.0%<br>(100.0%, 100.0%) | 98.51%<br>(97.39%, 99.62%) |
| <b>Abnormal vs Others</b>           | 0.9991<br>(0.9985 - 0.9998) | 100.0%<br>(100.0%, 100.0%) | 90.82%<br>(83.74%, 97.9%)  | 98.51%<br>(97.39%, 99.62%) |
| <b>Overall</b>                      | 0.9994<br>(0.9989 - 0.9998) | 98.51%<br>(97.39%, 99.62%) | 92.31%<br>(86.27%, 98.35%) | 98.51%<br>(97.39%, 99.62%) |
| <b>Overall<br/>(ResNet18)</b>       | 0.9992<br>(0.9987 - 0.9997) | 98.10%<br>(96.86%, 99.35%) | 90.50%<br>(84.39%, 96.6%)  | 98.10%<br>(96.86%, 99.35%) |
| <b>Overall<br/>(WideResNet50-2)</b> | 0.9990<br>(0.9983 - 0.9997) | 98.21%<br>(97.01%, 99.42%) | 90.97%<br>(85.03%, 96.9%)  | 98.21%<br>(97.01%, 99.42%) |
| <b>Overall<br/>(ResNext50)</b>      | 0.9988<br>(0.9981 - 0.9996) | 98.48%<br>(97.4%, 99.56%)  | 94.17%<br>(89.4%, 98.94%)  | 98.48%<br>(97.4%, 99.56%)  |

Asymptotic two-sided 95% CIs, adjusted for clustering by patients, were calculated and presented as proportions (sensitivity, specificity, accuracy) and the AUC.

Abbreviations: NC = nuclear color; CI = confidence interval; AUC = area under the receiver operating characteristic curve
