# Supplementary material for: Deep Learning-Based Cataract Detection and Grading from Slit-Lamp and Retro-Illumination Photographs: Model Development and Validation Study
Source: PubMed Central journal article supplement — Ophthalmol Sci. 2022 Mar 18;2(2):100147. doi: 10.1016/j.xops.2022.100147 (PMC9559082; doi:10.1016/j.xops.2022.100147), 2022-03-18
Supplement: mmc4.pdf [file mmc4.pdf]

**Table S4. Summary statistics for the diagnostic performance of the deep learning system on retro-illumination images (CO).**

|                                     | AUC                         | Sensitivity                | Specificity                | Accuracy                   |
|-------------------------------------|-----------------------------|----------------------------|----------------------------|----------------------------|
| <b>Normal vs Others</b>             | 0.9659<br>(0.9546 - 0.9772) | 92.69%<br>(88.45%, 96.93%) | 98.63%<br>(97.94%, 99.31%) | 96.21%<br>(94.43%, 97.99%) |
| <b>Abnormal vs Others</b>           | 0.9688<br>(0.9589 - 0.9787) | 98.63%<br>(97.94%, 99.31%) | 92.69%<br>(88.45%, 96.93%) | 96.21%<br>(94.43%, 97.99%) |
| <b>Overall</b>                      | 0.9680<br>(0.9579 - 0.9781) | 96.94%<br>(95.53%, 98.35%) | 96.78%<br>(94.83%, 98.74%) | 96.21%<br>(94.43%, 97.99%) |
| <b>Overall<br/>(ResNet18)</b>       | 0.9621<br>(0.9522 - 0.9720) | 95.73%<br>(93.66%, 97.79%) | 94.26%<br>(91.55%, 96.98%) | 95.73%<br>(93.66%, 97.79%) |
| <b>Overall<br/>(WideResNet50-2)</b> | 0.9581<br>(0.9485 - 0.9677) | 95.22%<br>(93.3%, 97.14%)  | 93.70%<br>(90.87%, 96.52%) | 95.22%<br>(93.3%, 97.14%)  |
| <b>Overall<br/>(ResNext50)</b>      | 0.9533<br>(0.9423 - 0.9644) | 96.14%<br>(94.54%, 97.75%) | 94.96%<br>(92.63%, 97.3%)  | 96.14%<br>(94.54%, 97.75%) |

Asymptotic two-sided 95% CIs, adjusted for clustering by patients, were calculated and presented as proportions (sensitivity, specificity, accuracy) and the AUC.

Abbreviations: CO = cortical opacity; CI = confidence interval; AUC = area under the receiver operating characteristic curve
