# Supplementary material for: Deep Learning-Based Cataract Detection and Grading from Slit-Lamp and Retro-Illumination Photographs: Model Development and Validation Study
Source: PubMed Central journal article supplement — Ophthalmol Sci. 2022 Mar 18;2(2):100147. doi: 10.1016/j.xops.2022.100147 (PMC9559082; doi:10.1016/j.xops.2022.100147), 2022-03-18
Supplement: mmc5.pdf [file mmc5.pdf]

**Table S5. Summary statistics for the diagnostic performance of the deep learning system on retro-illumination images (PSC).**

|                                     | AUC                         | Sensitivity                | Specificity                | Accuracy                   |
|-------------------------------------|-----------------------------|----------------------------|----------------------------|----------------------------|
| <b>Normal vs Others</b>             | 0.9468<br>(0.9351 - 0.9586) | 81.42%<br>(72.06%, 90.78%) | 98.13%<br>(97.51%, 98.75%) | 92.17%<br>(88.56%, 95.78%) |
| <b>Abnormal vs Others</b>           | 0.9748<br>(0.9673 - 0.9823) | 98.13%<br>(97.51%, 98.75%) | 81.42%<br>(72.06%, 90.78%) | 92.17%<br>(88.56%, 95.78%) |
| <b>Overall</b>                      | 0.9465<br>(0.9348 - 0.9582) | 92.13%<br>(88.65%, 95.61%) | 89.36%<br>(84.44%, 94.29%) | 92.17%<br>(88.56%, 95.78%) |
| <b>Overall<br/>(ResNet18)</b>       | 0.9408<br>(0.9276 - 0.9539) | 89.92%<br>(85.8%, 94.04%)  | 86.03%<br>(80.33%, 91.74%) | 89.92%<br>(85.8%, 94.04%)  |
| <b>Overall<br/>(WideResNet50-2)</b> | 0.9299<br>(0.9107 - 0.9491) | 91.84%<br>(88.42%, 95.26%) | 88.66%<br>(83.75%, 93.58%) | 91.84%<br>(88.42%, 95.26%) |
| <b>Overall<br/>(ResNext50)</b>      | 0.9131<br>(0.8961 - 0.9302) | 91.37%<br>(88.28%, 94.46%) | 88.24%<br>(83.23%, 93.24%) | 91.37%<br>(88.28%, 94.46%) |

Asymptotic two-sided 95% CIs, adjusted for clustering by patients, were calculated and presented as proportions (sensitivity, specificity, accuracy) and the AUC.

Abbreviations: PSC = posterior subcapsular opacity; CI = confidence interval; AUC = area under the receiver operating characteristic curve
