# Supplementary material for: Deep Learning-Based Cataract Detection and Grading from Slit-Lamp and Retro-Illumination Photographs: Model Development and Validation Study
Source: PubMed Central journal article supplement — Ophthalmol Sci. 2022 Mar 18;2(2):100147. doi: 10.1016/j.xops.2022.100147 (PMC9559082; doi:10.1016/j.xops.2022.100147), 2022-03-18
Supplement: mmc6.pdf [file mmc6.pdf]

**Table S6. Summary statistics for the grading prediction performance (LOCS- III based grading) of the deep learning system on slit-lamp images (NO).**

|                                     | AUC                         | Sensitivity                | Specificity                | Accuracy                   |
|-------------------------------------|-----------------------------|----------------------------|----------------------------|----------------------------|
| <b>Grade 0 vs Others</b>            | 0.9985<br>(0.9972 - 0.9998) | 95.16%<br>(90.07%, 100.0%) | 99.27%<br>(98.53%, 100.0%) | 98.58%<br>(97.60%, 99.55%) |
| <b>Grade 1 vs Others</b>            | 0.9482<br>(0.9314 - 0.9650) | 73.37%<br>(62.79%, 83.95%) | 98.17%<br>(96.78%, 99.57%) | 95.24%<br>(93.17%, 97.30%) |
| <b>Grade 2 vs Others</b>            | 0.9421<br>(0.9296 – 0.9547) | 84.26%<br>(77.69%, 90.83%) | 87.64%<br>(83.14%, 92.15%) | 86.72%<br>(83.72%, 90.18%) |
| <b>Grade 3 vs Others</b>            | 0.9340<br>(0.9162 – 0.9518) | 75.48%<br>(66.37%, 84.58%) | 89.18%<br>(86.70%, 91.66%) | 85.52%<br>(82.44%, 88.61%) |
| <b>Grade 4 vs Others</b>            | 0.9166<br>(0.8999 – 0.9333) | 73.02%<br>(63.99%, 82.04%) | 97.76%<br>(96.41%, 99.12%) | 95.11%<br>(93.61%, 96.61%) |
| <b>Grade 5 vs Others</b>            | 0.9617<br>(0.9489 – 0.9745) | 73.50%<br>(55.03%, 91.98%) | 96.86%<br>(95.06%, 98.66%) | 95.74%<br>(94.08%, 97.39%) |
| <b>Grade 6 vs Others</b>            | 0.9935<br>(0.9891 – 1.0000) | 95.40%<br>(86.94%, 100.0%) | 98.55%<br>(86.94%, 100.0%) | 98.45%<br>(97.32%, 99.58%) |
| <b>Overall</b>                      | 0.9567<br>(0.9501 – 0.9633) | 81.71%<br>(78.49%, 84.93%) | 93.10%<br>(91.63%, 94.57%) | 91.22%<br>(89.40%, 93.04%) |
| <b>Overall<br/>(ResNet18)</b>       | 0.9466<br>(0.9415 – 0.9517) | 79.12%<br>(75.51%, 82.72%) | 92.35%<br>(91.08%, 93.63%) | 90.79%<br>(89.16%, 92.42%) |
| <b>Overall<br/>(WideResNet50-2)</b> | 0.9471<br>(0.9402 – 0.9541) | 80.32%<br>(76.68%, 83.95%) | 92.49%<br>(91.11%, 93.88%) | 90.37%<br>(88.61%, 92.12%) |
| <b>Overall<br/>(ResNext50)</b>      | 0.9463<br>(0.9412 – 0.9514) | 78.96%<br>(75.07%, 82.85%) | 92.75%<br>(91.59%, 93.90%) | 90.76%<br>(89.14%, 92.38%) |

Asymptotic two-sided 95% CIs, adjusted for clustering by patients, were calculated and presented as proportions (sensitivity, specificity, accuracy) and the AUC.

Abbreviations: LOCS-III = Lens Opacities Classification System III; NO = nuclear opalescence; CI = confidence interval; AUC = area under the receiver operating characteristic curve
