# Supplementary material for: Deep Learning-Based Cataract Detection and Grading from Slit-Lamp and Retro-Illumination Photographs: Model Development and Validation Study
Source: PubMed Central journal article supplement — Ophthalmol Sci. 2022 Mar 18;2(2):100147. doi: 10.1016/j.xops.2022.100147 (PMC9559082; doi:10.1016/j.xops.2022.100147), 2022-03-18
Supplement: mmc7.pdf [file mmc7.pdf]

**Table S7. Summary statistics for the grading prediction performance (LOCS- III based grading) of the deep learning system on slit-lamp images (NC).**

|                                     | AUC                         | Sensitivity                | Specificity                | Accuracy                   |
|-------------------------------------|-----------------------------|----------------------------|----------------------------|----------------------------|
| <b>Grade 0 vs Others</b>            | 0.9981<br>(0.9958 – 1.0000) | 94.84%<br>(88.53%, 100.0%) | 99.61%<br>(98.75%, 100.0%) | 98.36%<br>(97.12%, 99.6%)  |
| <b>Grade 1 vs Others</b>            | 0.9711<br>(0.9337 – 1.0000) | 72.15%<br>(59.33%, 84.96%) | 94.42%<br>(91.94%, 96.72%) | 91.51%<br>(88.44%, 94.58%) |
| <b>Grade 2 vs Others</b>            | 0.9436<br>(0.8906 – 0.9966) | 77.16%<br>(69.41%, 84.91%) | 88.60%<br>(83.94%, 92.99%) | 85.79%<br>(81.72%, 89.86%) |
| <b>Grade 3 vs Others</b>            | 0.9162<br>(0.8624 – 0.9700) | 66.22%<br>(55.43%, 77.00%) | 92.71%<br>(90.43%, 95.82%) | 86.02%<br>(83.47%, 88.58%) |
| <b>Grade 4 vs Others</b>            | 0.9251<br>(0.8463- 1.0000)  | 71.33%<br>(56.96%, 85.71%) | 95.59%<br>(93.65%, 97.10%) | 92.65%<br>(90.45%, 94.85%) |
| <b>Grade 5 vs Others</b>            | 0.9560<br>(0.8628 – 1.0000) | 78.65%<br>(65.00%, 92.30%) | 96.33%<br>(93.86%, 98.53%) | 95.29%<br>(92.95%, 97.62%) |
| <b>Grade 6 vs Others</b>            | 0.9920<br>(0.9748 – 1.0000) | 72.04%<br>(54.07%, 90.02%) | 99.31%<br>(98.40%, 99.80%) | 98.36%<br>(97.21%, 99.51%) |
| <b>Overall</b>                      | 0.9650<br>(0.9509 – 0.9792) | 75.69%<br>(71.94%, 79.44%) | 93.71%<br>(92.62%, 94.80%) | 90.26%<br>(88.64%, 91.88%) |
| <b>Overall<br/>(ResNet18)</b>       | 0.9541<br>(0.9346 – 0.9737) | 72.89%<br>(67.22%, 78.56%) | 92.44%<br>(90.58%, 94.3%)  | 89.11%<br>(86.72%, 91.51%) |
| <b>Overall<br/>(WideResNet50-2)</b> | 0.9379<br>(0.9101 – 0.9656) | 71.46%<br>(66.66%, 76.26%) | 92.94%<br>(91.38%, 94.49%) | 88.42%<br>(86.23%, 90.61%) |
| <b>Overall<br/>(ResNext50)</b>      | 0.9585<br>(0.9424 – 0.9748) | 75.34%<br>(69.8%, 80.88%)  | 92.97%<br>(91.09%, 94.85%) | 89.68%<br>(87.05%, 92.3%)  |

Asymptotic two-sided 95% CIs, adjusted for clustering by patients, were calculated and presented as proportions (sensitivity, specificity, accuracy) and the AUC.

Abbreviations: LOCS-III = Lens Opacities Classification System III; NC = nuclear color; CI = confidence interval; AUC = area under the receiver operating characteristic curve
