# Supplementary material for: Deep Learning-Based Cataract Detection and Grading from Slit-Lamp and Retro-Illumination Photographs: Model Development and Validation Study
Source: PubMed Central journal article supplement — Ophthalmol Sci. 2022 Mar 18;2(2):100147. doi: 10.1016/j.xops.2022.100147 (PMC9559082; doi:10.1016/j.xops.2022.100147), 2022-03-18
Supplement: mmc8.pdf [file mmc8.pdf]

**Table S8. Summary statistics for the grading prediction performance (LOCS- III based grading) of the deep learning system on retro-illumination images (CO).**

|                                     | AUC                         | Sensitivity                | Specificity                | Accuracy                   |
|-------------------------------------|-----------------------------|----------------------------|----------------------------|----------------------------|
| <b>Grade 0 vs Others</b>            | 0.9757<br>(0.9671 – 0.9848) | 91.94%<br>(87.57%, 96.32%) | 90.50%<br>(86.56%, 96.32%) | 91.10%<br>(88.73%, 93.47%) |
| <b>Grade 1 vs Others</b>            | 0.7905<br>(0.7505- 0.8305)  | 73.79%<br>(62.11%, 85.47%) | 89.40%<br>(86.83%, 91.98%) | 87.62%<br>(84.88%, 90.37%) |
| <b>Grade 2 vs Others</b>            | 0.7394<br>(0.7066 – 0.7722) | 55.15%<br>(44.37%, 65.92%) | 92.85%<br>(90.39%, 95.32%) | 85.55%<br>(82.15%, 88.95%) |
| <b>Grade 3 vs Others</b>            | 0.8350<br>(0.8098 – 0.8603) | 68.17%<br>(60.88%, 75.45%) | 91.14%<br>(87.04%, 95.25%) | 87.14%<br>(83.69%, 90.59%) |
| <b>Grade 4 vs Others</b>            | 0.9679<br>(0.9560 – 0.9799) | 90.56%<br>(80.92%, 100.0%) | 94.73%<br>(92.34%, 97.12%) | 94.35%<br>(92.14%, 96.56%) |
| <b>Grade 5 vs Others</b>            | 0.9667<br>(0.9525 – 0.9809) | 83.49%<br>(73.91%, 93.07%) | 100.0%<br>(100.0%, 100.0%) | 99.45%<br>(98.97%, 99.93%) |
| <b>Overall</b>                      | 0.9044<br>(0.8958 – 0.9129) | 78.02%<br>(74.36%, 81.69%) | 94.05%<br>(92.78%, 95.32%) | 91.33%<br>(89.66%, 93.01%) |
| <b>Overall<br/>(ResNet18)</b>       | 0.8879<br>(0.8800 – 0.8958) | 76.99%<br>(73.46%, 80.52%) | 93.76%<br>(92.60%, 94.92%) | 90.57%<br>(88.78%, 92.35%) |
| <b>Overall<br/>(WideResNet50-2)</b> | 0.8899<br>(0.8804 – 0.8994) | 74.31%<br>(70.51%, 78.10%) | 92.79%<br>(91.41%, 94.16%) | 89.78%<br>(88.02%, 91.54%) |
| <b>Overall<br/>(ResNext50)</b>      | 0.8948<br>(0.8842 – 0.9054) | 77.50%<br>(73.61%, 81.40%) | 93.14%<br>(91.87%, 94.42%) | 91.15%<br>(89.39%, 92.90%) |

Asymptotic two-sided 95% CIs, adjusted for clustering by patients, were calculated and presented as proportions (sensitivity, specificity, accuracy) and the AUC.

Abbreviations: LOCS-III = Lens Opacities Classification System III; CO = cortical opacity; CI = confidence interval; AUC = area under the receiver operating characteristic curve
