# Supplementary material for: Deep Learning-Based Cataract Detection and Grading from Slit-Lamp and Retro-Illumination Photographs: Model Development and Validation Study
Source: PubMed Central journal article supplement — Ophthalmol Sci. 2022 Mar 18;2(2):100147. doi: 10.1016/j.xops.2022.100147 (PMC9559082; doi:10.1016/j.xops.2022.100147), 2022-03-18
Supplement: mmc9.pdf [file mmc9.pdf]

**Table S9. Summary statistics for the grading prediction performance (LOCS- III based grading) of the deep learning system on retro-illumination images (PSC).**

|                                     | AUC                         | Sensitivity                | Specificity                | Accuracy                   |
|-------------------------------------|-----------------------------|----------------------------|----------------------------|----------------------------|
| <b>Grade 0 vs Others</b>            | 0.9391<br>(0.9220 – 0.9563) | 81.41%<br>(72.58%, 90.25%) | 86.78%<br>(83.53%, 90.03%) | 84.67%<br>(80.81%, 88.54%) |
| <b>Grade 1 vs Others</b>            | 0.7441<br>(0.6925 – 0.7959) | 72.94%<br>(61.58%, 84.30%) | 93.33%<br>(90.03%)         | 90.83%<br>(87.69%, 93.96%) |
| <b>Grade 2 vs Others</b>            | 0.7716<br>(0.7186 – 0.8247) | 63.36%<br>(55.47%, 71.25%) | 96.39%<br>(93.05%, 99.73%) | 90.05%<br>(86.50%, 93.60%) |
| <b>Grade 3 vs Others</b>            | 0.8532<br>(0.7885 – 0.9179) | 63.77%<br>(54.34%, 73.21%) | 94.18%<br>(90.52%, 97.84%) | 86.95%<br>(83.13%, 90.77%) |
| <b>Grade 4 vs Others</b>            | 0.9663<br>(0.9556 – 0.9772) | 71.58%<br>(57.82%, 85.34%) | 91.74%<br>(87.72%, 95.75%) | 89.20%<br>(84.82%, 93.58%) |
| <b>Grade 5 vs Others</b>            | 0.9848<br>(0.9781 – 0.9914) | 100.0%<br>(100.0%, 100.0%) | 100.0%<br>(100.0%, 100.0%) | 100.0%<br>(100.0%, 100.0%) |
| <b>Overall</b>                      | 0.9174<br>(0.9055 – 0.9295) | 71.49%<br>(66.58%, 76.41%) | 91.64%<br>(90.36%, 92.92%) | 87.89%<br>(85.58%, 90.20%) |
| <b>Overall<br/>(ResNet18)</b>       | 0.8952<br>(0.8801 – 0.9103) | 67.87%<br>(63.24%, 72.50%) | 91.06%<br>(89.93%, 92.20%) | 86.37%<br>(84.44%, 88.31%) |
| <b>Overall<br/>(WideResNet50-2)</b> | 0.9087<br>(0.8970 – 0.9203) | 70.88%<br>(65.77%, 75.99%) | 91.21%<br>(89.98%, 92.44%) | 87.16%<br>(84.93%, 89.40%) |
| <b>Overall<br/>(ResNext50)</b>      | 0.9141<br>(0.9034 – 0.9248) | 68.55%<br>(63.23%, 73.86%) | 91.10%<br>(90.01%, 92.19%) | 87.61%<br>(85.53%, 89.68%) |

Asymptotic two-sided 95% CIs, adjusted for clustering by patients, were calculated and presented as proportions (sensitivity, specificity, accuracy) and the AUC.

Abbreviations: LOCS-III = Lens Opacities Classification System III; PSC = posterior subcapsular opacity; CI = confidence interval; AUC = area under the receiver operating characteristic curve
