# Supplementary material for: Deep Learning-Based Cataract Detection and Grading from Slit-Lamp and Retro-Illumination Photographs: Model Development and Validation Study
Source: PubMed Central journal article supplement — Ophthalmol Sci. 2022 Mar 18;2(2):100147. doi: 10.1016/j.xops.2022.100147 (PMC9559082; doi:10.1016/j.xops.2022.100147), 2022-03-18
Supplement: mmc10.pdf [file mmc10.pdf]

**Table S10. Summary statistics for the severity prediction performance (Severity based grading) of the deep learning system on slit-lamp images (NO).**

|                                     | AUC                         | Sensitivity                | Specificity                | Accuracy                   |
|-------------------------------------|-----------------------------|----------------------------|----------------------------|----------------------------|
| <b>Normal vs Others</b>             | 0.9990<br>(0.9982 – 0.9999) | 96.37%<br>(91.45%, 100.0%) | 99.55%<br>(98.84%, 100.0%) | 98.90%<br>(97.93%, 99.86%) |
| <b>Mild vs Others</b>               | 0.9727<br>(0.9634 – 0.9820) | 90.97%<br>(86.35%, 95.59%) | 94.53%<br>(91.66%, 97.41%) | 93.23%<br>(90.69%, 95.78%) |
| <b>Moderate vs Others</b>           | 0.9478<br>(0.9314 – 0.9642) | 88.35%<br>(83.3%, 93.4%)   | 92.02%<br>(88.35%, 95.70%) | 90.53%<br>(87.32%, 93.74%) |
| <b>Severe vs Others</b>             | 0.9860<br>(0.9794 – 0.9926) | 96.16%<br>(92.55%, 99.76%) | 98.01%<br>(96.63%, 99.40%) | 97.87%<br>(96.52%, 99.22%) |
| <b>Overall</b>                      | 0.9789<br>(0.9733 – 0.9845) | 91.10%<br>(88.18%, 94.02%) | 94.69%<br>(92.88%, 96.5%)  | 93.51%<br>(91.39%, 95.63%) |
| <b>Overall<br/>(ResNet18)</b>       | 0.9587<br>(0.9516 – 0.9657) | 88.38%<br>(85.53%, 91.23%) | 92.73%<br>(91.0%, 94.45%)  | 91.29%<br>(89.26%, 93.33%) |
| <b>Overall<br/>(WideResNet50-2)</b> | 0.9749<br>(0.9686 – 0.9813) | 90.22%<br>(87.76%, 92.69%) | 94.24%<br>(92.68%, 95.81%) | 92.85%<br>(91.08%, 94.63%) |
| <b>Overall<br/>(ResNext50)</b>      | 0.9698<br>(0.9646 – 0.9751) | 89.2%<br>(85.79%, 92.6%)   | 93.67%<br>(91.71%, 95.63%) | 92.34%<br>(90.04%, 94.64%) |

Asymptotic two-sided 95% CIs, adjusted for clustering by patients, were calculated and presented as proportions (sensitivity, specificity, accuracy) and the AUC.

Abbreviations: NO = nuclear opalescence; CI = confidence interval; AUC = area under the receiver operating characteristic curve
