# Supplementary material for: Deep Learning-Based Cataract Detection and Grading from Slit-Lamp and Retro-Illumination Photographs: Model Development and Validation Study
Source: PubMed Central journal article supplement — Ophthalmol Sci. 2022 Mar 18;2(2):100147. doi: 10.1016/j.xops.2022.100147 (PMC9559082; doi:10.1016/j.xops.2022.100147), 2022-03-18
Supplement: mmc11.pdf [file mmc11.pdf]

**Table S11. Summary statistics for the severity prediction performance (Severity based grading) of the deep learning system on slit-lamp images (NC).**

|                                     | AUC                         | Sensitivity                | Specificity                | Accuracy                   |
|-------------------------------------|-----------------------------|----------------------------|----------------------------|----------------------------|
| <b>Normal vs Others</b>             | 0.9990<br>(0.9963 – 1.0000) | 95.57%<br>(90.65%, 100.0%) | 99.55%<br>(98.85%, 100.0%) | 98.88%<br>(97.85%, 99.91%) |
| <b>Mild vs Others</b>               | 0.9777<br>(0.9500 – 1.0000) | 89.2%<br>(84.62%, 93.78%)  | 91.06%<br>(87.43%, 94.69%) | 90.35%<br>(87.54%, 93.16%) |
| <b>Moderate vs Others</b>           | 0.9579<br>(0.9178 – 0.9981) | 85.22%<br>(79.87%, 90.56%) | 92.16%<br>(89.25%, 95.06%) | 89.57%<br>(86.62%, 92.52%) |
| <b>Severe vs Others</b>             | 0.9903<br>(0.9755 – 1.0000) | 84.73%<br>(72.14%, 97.32%) | 95.16%<br>(93.08%, 97.24%) | 94.36%<br>(92.24%, 96.49%) |
| <b>Overall</b>                      | 0.9842<br>(0.9711 – 0.9974) | 88.44%<br>(85.33%, 91.55%) | 93.21%<br>(91.38%, 95.03%) | 91.70%<br>(89.63%, 93.77%) |
| <b>Overall<br/>(ResNet18)</b>       | 0.9744<br>(0.9604 – 0.9885) | 87.22%<br>(83.98%, 90.45%) | 91.54%<br>(89.28%, 93.8%)  | 90.39%<br>(88.09%, 92.69%) |
| <b>Overall<br/>(WideResNet50-2)</b> | 0.9764<br>(0.9532 – 0.9996) | 87.41%<br>(84.43%, 90.38%) | 91.96%<br>(90.03%, 93.89%) | 90.43%<br>(88.32%, 92.54%) |
| <b>Overall<br/>(ResNext50)</b>      | 0.9739<br>(0.9552 – 0.9926) | 85.73%<br>(82.21%, 89.25%) | 91.51%<br>(89.34%, 93.68%) | 89.86%<br>(87.49%, 92.23%) |

Asymptotic two-sided 95% CIs, adjusted for clustering by patients, were calculated and presented as proportions (sensitivity, specificity, accuracy) and the AUC.

Abbreviations: NC = nuclear color; CI = confidence interval; AUC = area under the receiver operating characteristic curve
