# Supplementary material for: Deep Learning-Based Cataract Detection and Grading from Slit-Lamp and Retro-Illumination Photographs: Model Development and Validation Study
Source: PubMed Central journal article supplement — Ophthalmol Sci. 2022 Mar 18;2(2):100147. doi: 10.1016/j.xops.2022.100147 (PMC9559082; doi:10.1016/j.xops.2022.100147), 2022-03-18
Supplement: mmc12.pdf [file mmc12.pdf]

**Table S12. Summary statistics for the severity prediction performance (Severity based grading) of the deep learning system on slit-lamp images (CO).**

|                                     | AUC                         | Sensitivity                | Specificity                 | Accuracy                    |
|-------------------------------------|-----------------------------|----------------------------|-----------------------------|-----------------------------|
| <b>Normal vs Others</b>             | 0.9690<br>(0.9596 – 0.9784) | 94.37%<br>(91.01%, 97.74%) | 93.53%,<br>(90.88%, 96.18%) | 93.86%,<br>(91.69%, 96.02%) |
| <b>Mild vs Others</b>               | 0.8672<br>(0.8420 – 0.8924) | 53.01%<br>(39.50%, 66.52%) | 98.07%,<br>(96.84%, 99.29%) | 93.07%,<br>(90.78%, 95.36%) |
| <b>Moderate vs Others</b>           | 0.9230<br>(0.9093 – 0.9367) | 88.84%<br>(84.03%, 93.65%) | 92.61%,<br>(89.12%, 96.10%) | 91.26%,<br>(88.50%, 94.02%) |
| <b>Severe vs Others</b>             | 0.9927<br>(0.9889 – 0.9965) | 98.20%<br>(95.53%, 100.0%) | 98.29%,<br>(96.96%, 99.63%) | 98.29%,<br>(97.04%, 99.54%) |
| <b>Overall</b>                      | 0.9395<br>(0.9323 – 0.9467) | 88.06%<br>(84.76%, 91.37%) | 94.26%,<br>(92.74%, 95.77%) | 93.30%,<br>(91.51%, 95.10%) |
| <b>Overall<br/>(ResNet18)</b>       | 0.9186<br>(0.9100 – 0.9272) | 87.10%<br>(84.02%, 90.19%) | 92.93%<br>(91.34%, 94.53%)  | 92.53%<br>(90.59%, 94.47%)  |
| <b>Overall<br/>(WideResNet50-2)</b> | 0.9294<br>(0.9187 – 0.9400) | 87.38%<br>(84.4%, 90.36%)  | 93.55%<br>(91.86%, 95.24%)  | 92.53%<br>(90.62%, 94.43%)  |
| <b>Overall<br/>(ResNext50)</b>      | 0.9246<br>(0.9160 – 0.9333) | 83.52%<br>(79.99%, 87.04%) | 93.15%<br>(91.21%, 95.09%)  | 90.55%<br>(88.41%, 92.68%)  |

Asymptotic two-sided 95% CIs, adjusted for clustering by patients, were calculated and presented as proportions (sensitivity, specificity, accuracy) and the area under the curve (AUC).

Abbreviations: CO = cortical opacity; CI = confidence interval; AUC = area under the receiver operating characteristic curve
