# Supplementary material for: Deep Learning-Based Cataract Detection and Grading from Slit-Lamp and Retro-Illumination Photographs: Model Development and Validation Study
Source: PubMed Central journal article supplement — Ophthalmol Sci. 2022 Mar 18;2(2):100147. doi: 10.1016/j.xops.2022.100147 (PMC9559082; doi:10.1016/j.xops.2022.100147), 2022-03-18
Supplement: mmc13.pdf [file mmc13.pdf]

**Table S13. Summary statistics for the severity prediction performance (Severity based grading) of the deep learning system on slit-lamp images (PSC).**

|                                     | AUC                         | Sensitivity                | Specificity                | Accuracy                   |
|-------------------------------------|-----------------------------|----------------------------|----------------------------|----------------------------|
| <b>Normal vs Others</b>             | 0.9362<br>(0.9218 – 0.9506) | 83.13%<br>(75.25%, 91.01%) | 88.76%<br>(86.31%, 91.21%) | 86.64%<br>(83.28%, 90.01%) |
| <b>Mild vs Others</b>               | 0.8878<br>(0.8581 – 0.9175) | 78.74%<br>(68.49%, 88.98%) | 98.83%<br>(98.04%, 99.63%) | 95.43%<br>(93.42%, 97.44%) |
| <b>Moderate vs Others</b>           | 0.7569<br>(0.7081 – 0.8057) | 74.86%<br>(69.52%, 80.19%) | 92.58%<br>(88.07%, 97.10%) | 86.43%<br>(82.76%, 90.09%) |
| <b>Severe vs Others</b>             | 0.9653<br>(0.9477- 0.9829)  | 100.0%<br>(100.0%, 100.0%) | 93.45%<br>(89.9%, 96.99%)  | 94.14%<br>(90.98%, 97.31%) |
| <b>Overall</b>                      | 0.9102<br>(0.8935 – 0.9269) | 81.32%<br>(77.22%, 85.42%) | 92.30%<br>(90.4%, 94.20%)  | 88.82%<br>(86.33%, 91.32%) |
| <b>Overall<br/>(ResNet18)</b>       | 0.8861<br>(0.8724 – 0.8997) | 79.17%<br>(75.17%, 83.18%) | 92.21%<br>(90.32%, 94.11%) | 87.73%<br>(85.17%, 90.29%) |
| <b>Overall<br/>(WideResNet50-2)</b> | 0.8908<br>(0.8765 – 0.9052) | 80.64%<br>(75.8%, 85.49%)  | 92.18%<br>(90.26%, 94.1%)  | 88.33%<br>(85.36%, 91.29%) |
| <b>Overall<br/>(ResNext50)</b>      | 0.9007<br>(0.8858 – 0.9155) | 79.23%<br>(75.34%, 83.13%) | 91.77%<br>(89.94%, 93.61%) | 87.77%<br>(85.33%, 90.21%) |

Asymptotic two-sided 95% CIs, adjusted for clustering by patients, were calculated and presented as proportions (sensitivity, specificity, accuracy) and the AUC.

Abbreviations: PSC = posterior subcapsular opacity; CI = confidence interval; AUC = area under the receiver operating characteristic curve
