# Supplementary material for: Deep Learning-Based Cataract Detection and Grading from Slit-Lamp and Retro-Illumination Photographs: Model Development and Validation Study
Source: PubMed Central journal article supplement — Ophthalmol Sci. 2022 Mar 18;2(2):100147. doi: 10.1016/j.xops.2022.100147 (PMC9559082; doi:10.1016/j.xops.2022.100147), 2022-03-18

**Figure S1.** Examples of slit-lamp images that correspond to the seven-level classification of NO and NC. (Abbreviations: NC: nuclear color, NO: nuclear opalescence)

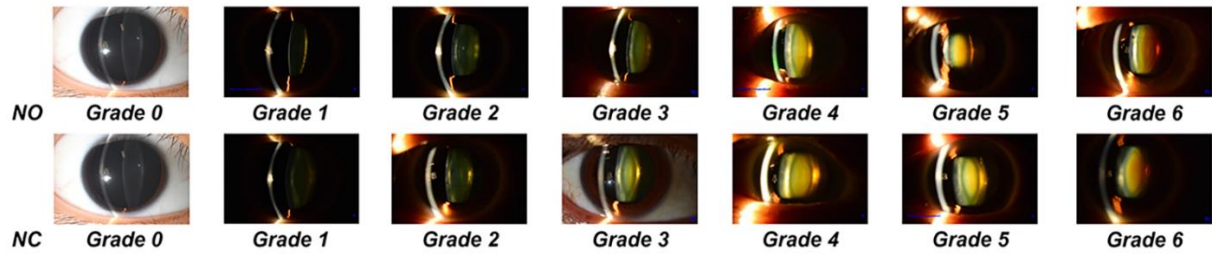

Supplement: mmc15.pdf [file mmc15.pdf]
