# Supplementary material for: Deep Learning-Based Cataract Detection and Grading from Slit-Lamp and Retro-Illumination Photographs: Model Development and Validation Study
Source: PubMed Central journal article supplement — Ophthalmol Sci. 2022 Mar 18;2(2):100147. doi: 10.1016/j.xops.2022.100147 (PMC9559082; doi:10.1016/j.xops.2022.100147), 2022-03-18

**Figure S2.** Examples of retro-illumination images that correspond to the six-level classification of CO and PSC. (Abbreviations: CO: cortical opacity, PSC: posterior subcapsular opacity)

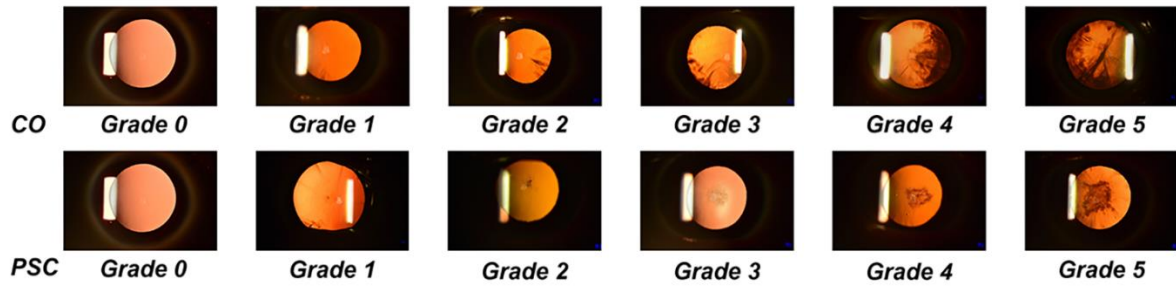

Supplement: mmc16.pdf [file mmc16.pdf]
