# Supplementary material for: Deep Learning-Based Cataract Detection and Grading from Slit-Lamp and Retro-Illumination Photographs: Model Development and Validation Study
Source: PubMed Central journal article supplement — Ophthalmol Sci. 2022 Mar 18;2(2):100147. doi: 10.1016/j.xops.2022.100147 (PMC9559082; doi:10.1016/j.xops.2022.100147), 2022-03-18

**Figure S3.** Examples for results of the Region Detection Network (RDN) for slit-lamp and retro-illumination images. RDN automatically find the cataract region of images and discard the unnecessary information, which interferes with the network's prediction.

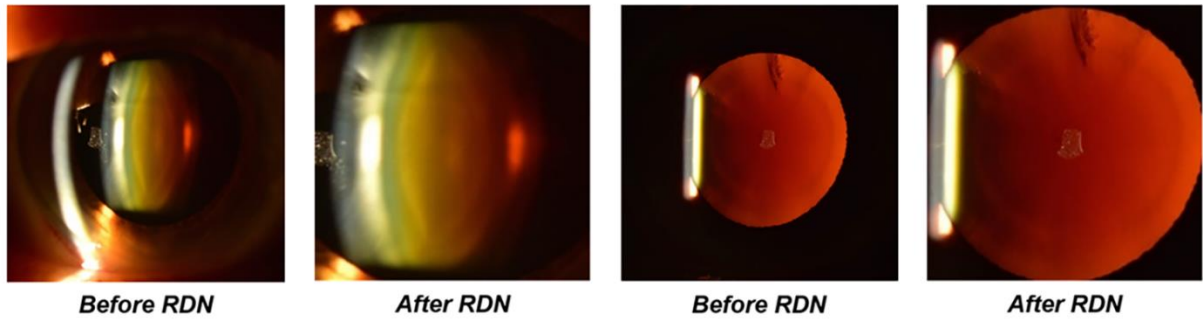

Supplement: mmc17.pdf [file mmc17.pdf]
