# Supplementary material for: Deep Learning-Based Cataract Detection and Grading from Slit-Lamp and Retro-Illumination Photographs: Model Development and Validation Study
Source: PubMed Central journal article supplement — Ophthalmol Sci. 2022 Mar 18;2(2):100147. doi: 10.1016/j.xops.2022.100147 (PMC9559082; doi:10.1016/j.xops.2022.100147), 2022-03-18

**Figure S4.** An example of heatmaps based on GradCAM and GradCAM++ of correctly classified slit-lamp image and retro-illumination image. Because the late layer learns high-level visual information, which is semantically important, we exploit the output of the fourth layer of classification networks. Regions colored red contribute more to the network’s classification of the image than regions colored blue.

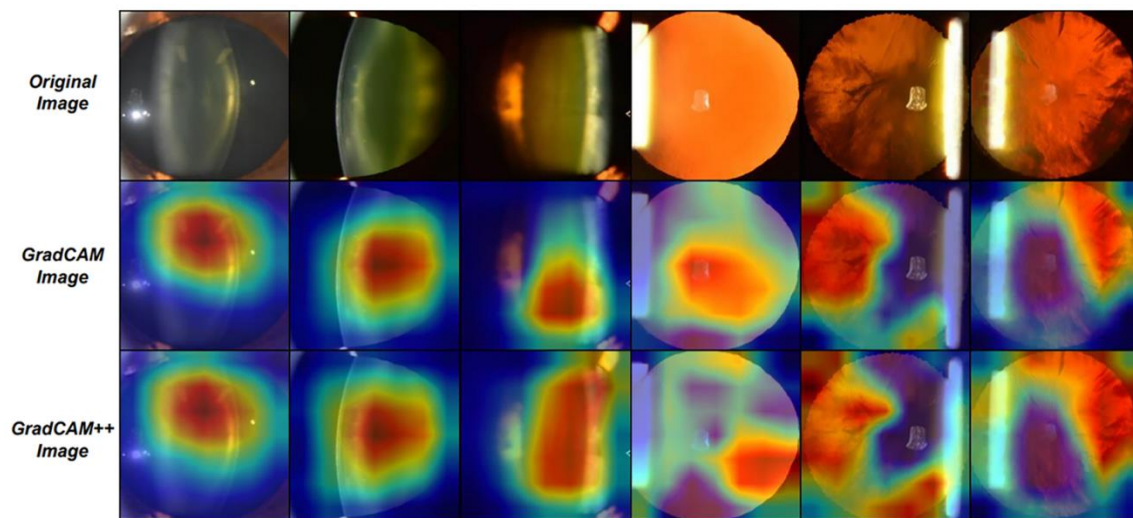

Supplement: mmc18.pdf [file mmc18.pdf]
