# Supplementary material for: Deep Learning-Based Cataract Detection and Grading from Slit-Lamp and Retro-Illumination Photographs: Model Development and Validation Study
Source: PubMed Central journal article supplement — Ophthalmol Sci. 2022 Mar 18;2(2):100147. doi: 10.1016/j.xops.2022.100147 (PMC9559082; doi:10.1016/j.xops.2022.100147), 2022-03-18

**Figure S5.** Ablation study of different techniques of our framework. Each row corresponds to NO, NC, CO, and PSC respectively (ACC: accuracy, SN: sensitivity, SP: specificity, AUC: area under the ROC curve, NC: nuclear color, NO: nuclear opalescence, CO: cortical opacity, PSC: posterior subcapsular opacity). The red bar denotes the average of instances of which the technique is applied, and the blue bar represents instances in which the technique is not used.

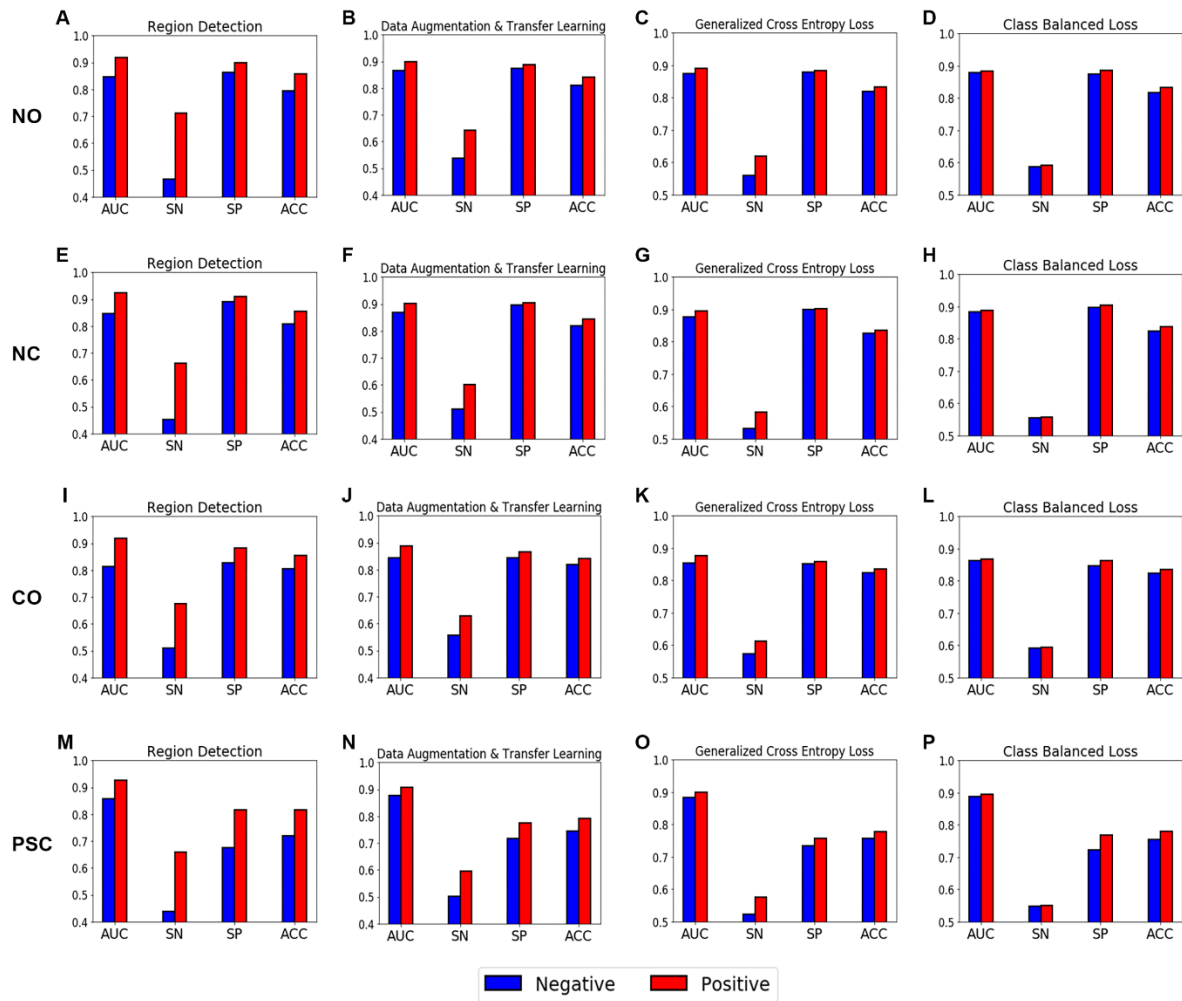

Supplement: mmc19.pdf [file mmc19.pdf]
