# Supplementary material for: Deep Learning-Based Cataract Detection and Grading from Slit-Lamp and Retro-Illumination Photographs: Model Development and Validation Study
Source: PubMed Central journal article supplement — Ophthalmol Sci. 2022 Mar 18;2(2):100147. doi: 10.1016/j.xops.2022.100147 (PMC9559082; doi:10.1016/j.xops.2022.100147), 2022-03-18

**Figure S6.** An overview of our DL system’s concept. (a) The pipeline of Region Detection Network~(RDN) that consists of the feature learner and following Faster R-CNN module, (b) The architecture of ResNet-18, the smallest instance of “Residual Networks”, we exploit ResNet-50 on learning high-level feature in RDN and ResNet-18 on classifying the cropped image patches, (c) The residual block, which is used as a basic block for building residual networks, (d) The data augmentation method, which enhances generalization ability and is especially effective in scarce data setting, and (e) The transfer-learning method, which also aids to generalize in other data by providing the “initialization point” of the network parameters is described.

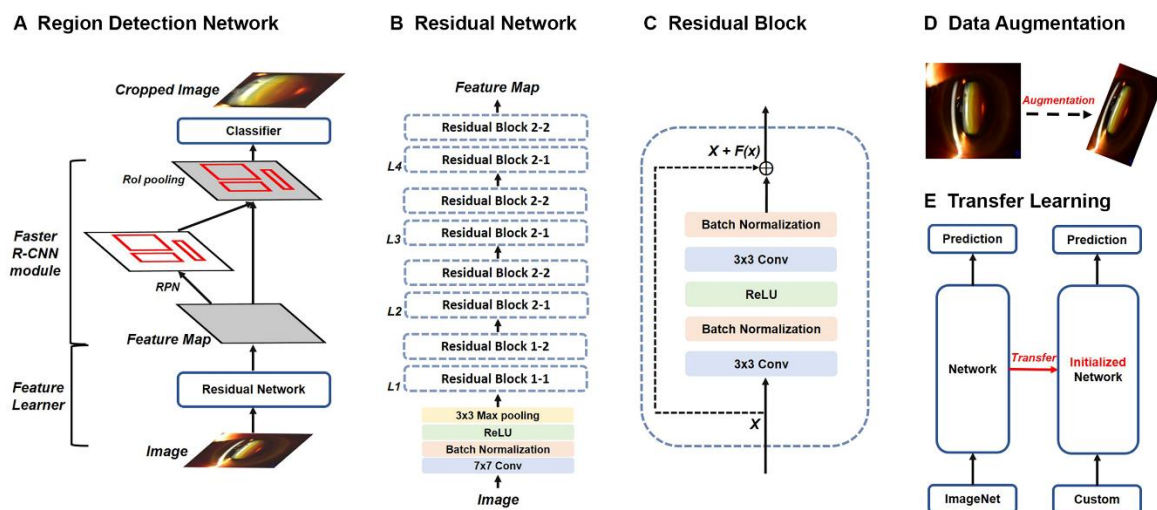

Supplement: mmc20.pdf [file mmc20.pdf]
